# Supplementary material for: Aqueous one-pot synthesis of epoxy-functional diblock copolymer worms from a single monomer: new anisotropic scaffolds for potential charge storage applications
Source: Royal Society of Chemistry journal article supplement (doi:10.1039/c8py01427b), 2018-11-29
Supplement: c8py01427b1.pdf [file c8py01427b1.pdf]

## Supporting Information

### **Aqueous one-pot synthesis of epoxy-functional diblock copolymer worms from a single monomer: new anisotropic scaffolds for potential charge storage applications**

Fiona L. Hatton<sup>a\*†</sup>, Albert M. Park<sup>b</sup>, Yiren Zhang<sup>c</sup>, Gregory D. Fuchs<sup>b</sup>, Christopher K. Ober<sup>c</sup> and Steven P. Armes<sup>a\*</sup>

<sup>a</sup> Dainton Building, Department of Chemistry, University of Sheffield, Brook Hill, Sheffield, South Yorkshire S3 7HF, UK.

<sup>b</sup> School of Applied and Engineering Physics, Cornell University, Ithaca, NY 14853 USA.

<sup>c</sup> Materials Science and Engineering, Cornell University, Ithaca, New York 14853 USA.

\*Corresponding author contact details (s.p.arnes@sheffield.ac.uk, f.hatton@lboro.ac.uk)

†Current address: Department of Materials, Loughborough University, Loughborough, Leicestershire, LE11 3TU, UK.

### **Table of Contents**

|                          |    |
|--------------------------|----|
| Figures and Tables ..... | S2 |
| SAXS Model.....          | S9 |

## Figures and Tables

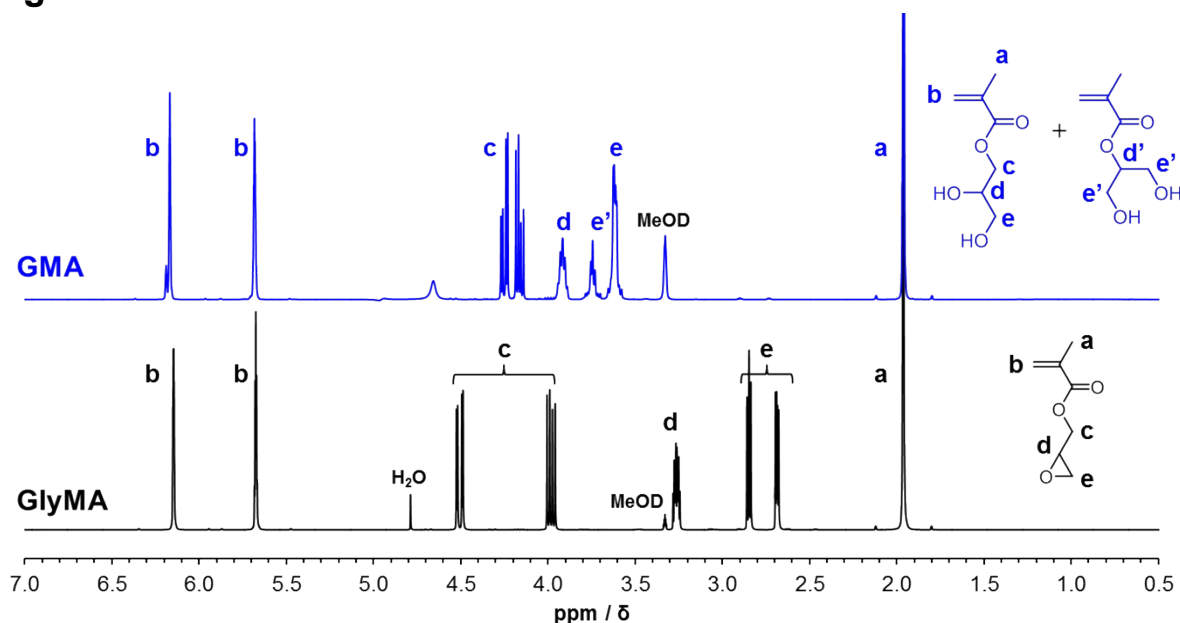

**Figure S1.**  $^1\text{H}$  NMR (400 MHz,  $\text{CD}_3\text{OD}$ ) spectra obtained for glycidyl methacrylate (GlyMA) and after its hydrolysis to afford glycerol monomethacrylate (GMA). The GMA spectrum was recorded using solvent suppression of the water peak.

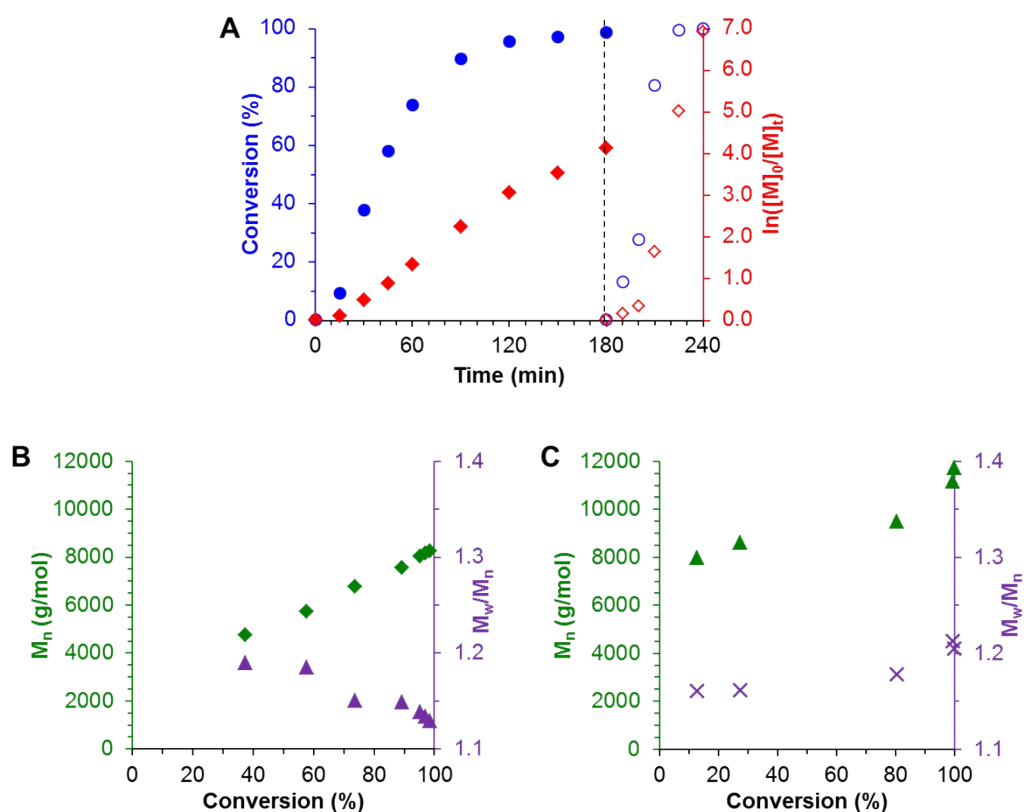

**Figure S2.** Kinetics of the RAFT aqueous solution polymerization of GMA and subsequent chain extension of the resulting water-soluble PGMA precursor via RAFT aqueous emulsion polymerization of GlyMA, targeting a  $\text{PGMA}_{25}\text{-PGlyMA}_{45}$  diblock composition. (A) Conversion vs. time curves obtained from  $^1\text{H}$  NMR studies, and the evolution of  $M_n$  and  $M_w/M_n$  with conversion for (B) the RAFT aqueous solution polymerization of GMA and (C) the RAFT aqueous emulsion polymerization of GlyMA.

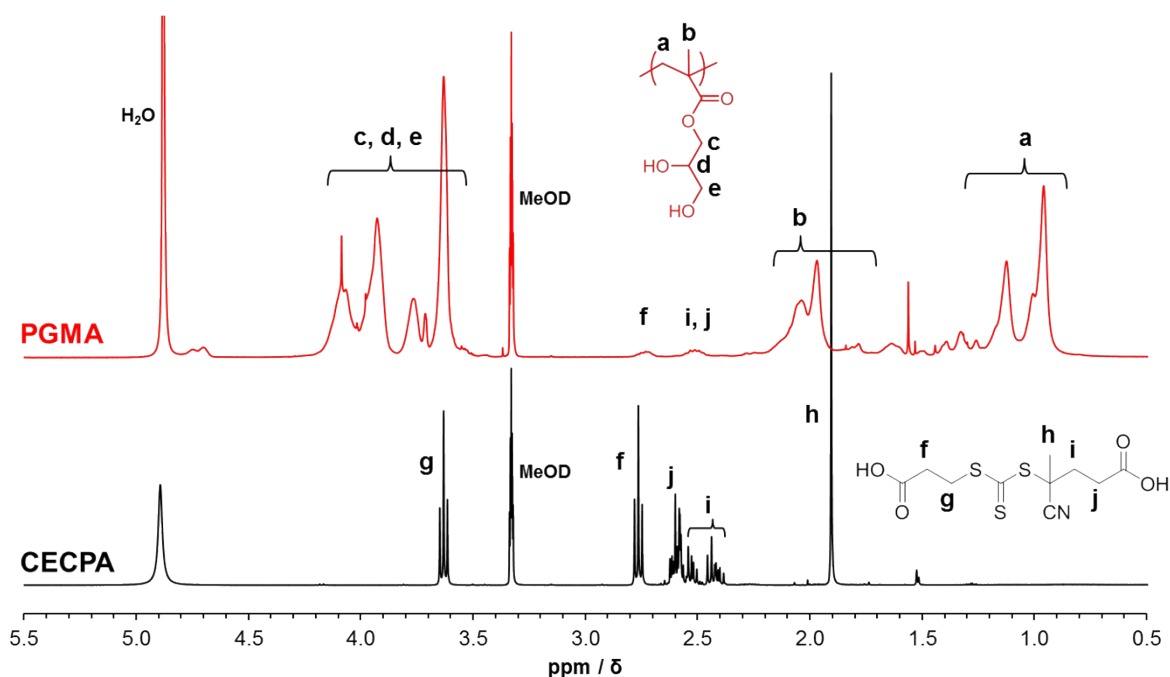

**Figure S3.**  $^1\text{H}$  NMR (400 MHz,  $\text{CD}_3\text{OD}$ ) spectra recorded for 4-(((2-carboxyethyl)thio)carbonothioyl)thio-4-cyanopentanoic acid (CECPA) and poly(glycerol monomethacrylate) ( $\text{PGMA}_{25}$ ) after purification by precipitation. End-group analysis of the PGMA precursor indicated a mean DP of 25, when targeting a mean DP of 20, suggesting a CECPA RAFT agent efficiency of 80%. The DP was calculated by end-group analysis by comparing the integrated intensity for signal *f* (2.73 ppm), which is assigned to two  $\text{HOOC-CH}_2$  protons located on chain-ends derived from the CECPA RAFT agent, to that of signals *c*, *d* and *e* assigned to the five protons on the pendent glyceryl groups (3.5–4.2 ppm) of the GMA repeat units.

**Table S1.** Summary of conversion and molecular weight data obtained for five RAFT solution polymerizations of GMA (obtained via hydrolysis of GlyMA) at 11.2% w/w, when targeting a mean DP of 25 using CECPA as the chain transfer agent. The CTA/VA-044 molar ratio was 4.0 in all cases and each polymerization was conducted at 50 °C for 3 h at a solution pH of 2.5–3.0. These five entries suggest good reproducibility for the synthesis of the  $\text{PGMA}_{25}$  precursor via RAFT aqueous solution polymerization of GMA.

| Entry no. | Target Composition | Conversion (%) <sup>a</sup> | $M_n$ (g mol <sup>-1</sup> ) <sup>b</sup> | $M_w$ (g mol <sup>-1</sup> ) <sup>b</sup> | $M_w/M_n$ <sup>b</sup> |
|-----------|--------------------|-----------------------------|-------------------------------------------|-------------------------------------------|------------------------|
| 1         | $\text{PGMA}_{25}$ | >99                         | 7,900                                     | 9,050                                     | 1.14                   |
| 2         | $\text{PGMA}_{25}$ | 98.4                        | 8,200                                     | 9,300                                     | 1.13                   |
| 3         | $\text{PGMA}_{25}$ | >99                         | 8,200                                     | 9,000                                     | 1.11                   |
| 4         | $\text{PGMA}_{25}$ | >99                         | 8,050                                     | 8,900                                     | 1.11                   |
| 5         | $\text{PGMA}_{25}$ | >99                         | 8,300                                     | 9,300                                     | 1.12                   |

<sup>a</sup> Determined by  $^1\text{H}$  NMR spectroscopy using  $d_6$ -DMSO. <sup>b</sup> Determined by gel permeation chromatography analysis using DMF eluent containing 10 mM LiBr, a refractive index detector and calibration against a series of near-monodisperse poly(methyl methacrylate) standards.

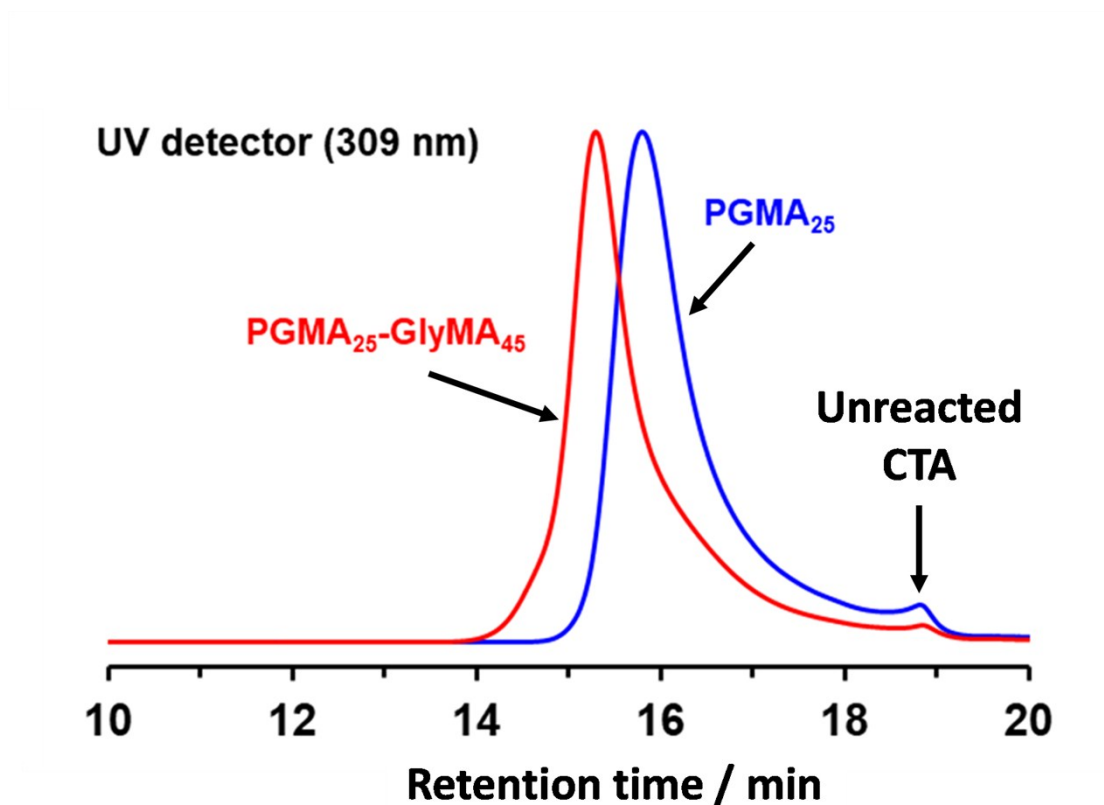

**Figure S4.** Normalized UV GPC chromatograms for a PGMA<sub>25</sub> macro-CTA and the corresponding PGMA<sub>25</sub>-PGlyMA<sub>45</sub> diblock copolymer after chain extension. The small peak at 18.8 min corresponds to unreacted CTA. (PGMA<sub>25</sub>  $M_n$  = 8 000 g mol<sup>-1</sup>,  $\bar{D}$  = 1.22; PGMA<sub>25</sub>-PGlyMA<sub>45</sub>:  $M_n$  = 12 600 g mol<sup>-1</sup>,  $\bar{D}$  = 1.32).

**Table S2.** Summary of conversion, molecular weight and DLS data for various PGMA<sub>25</sub>-PGlyMA<sub>x</sub> diblock copolymer worms prepared by chain extension of a PGMA<sub>25</sub> macro-CTA via RAFT aqueous emulsion polymerization of GlyMA at 15% w/w. All syntheses were conducted at 50 °C for 2 h at a solution pH of 2.5-3.0.

| Target Composition                       | Conversion (%) <sup>a</sup> | $M_n$ (g mol <sup>-1</sup> ) <sup>b</sup> | $M_w$ (g mol <sup>-1</sup> ) <sup>b</sup> | $M_w/M_n$ <sup>b</sup> | $D_{DLS}$ (nm) | PDI  |
|------------------------------------------|-----------------------------|-------------------------------------------|-------------------------------------------|------------------------|----------------|------|
| PGMA <sub>25</sub> -PGlyMA <sub>25</sub> | >99                         | 10 400                                    | 12 600                                    | 1.21                   | 19             | 0.14 |
| PGMA <sub>25</sub> -PGlyMA <sub>40</sub> | >99                         | 12 100                                    | 14 700                                    | 1.21                   | 143            | 0.48 |
| PGMA <sub>25</sub> -PGlyMA <sub>45</sub> | >99                         | 12 500                                    | 15 500                                    | 1.23                   | 324            | 0.50 |
| PGMA <sub>25</sub> -PGlyMA <sub>50</sub> | >99                         | 12 500                                    | 15 800                                    | 1.27                   | 306            | 0.66 |
| PGMA <sub>25</sub> -PGlyMA <sub>55</sub> | >99                         | 13 000                                    | 16 600                                    | 1.27                   | 384            | 0.56 |
| PGMA <sub>25</sub> -PGlyMA <sub>60</sub> | >99                         | 13 900                                    | 17 500                                    | 1.26                   | 262            | 0.26 |

<sup>a</sup> Determined by <sup>1</sup>H NMR spectroscopy using *d*<sub>6</sub>-DMSO. <sup>b</sup> Determined by gel permeation chromatography analysis using DMF eluent containing 10 mM LiBr, a refractive index detector and calibration against a series of near-monodisperse poly(methyl methacrylate) standards.

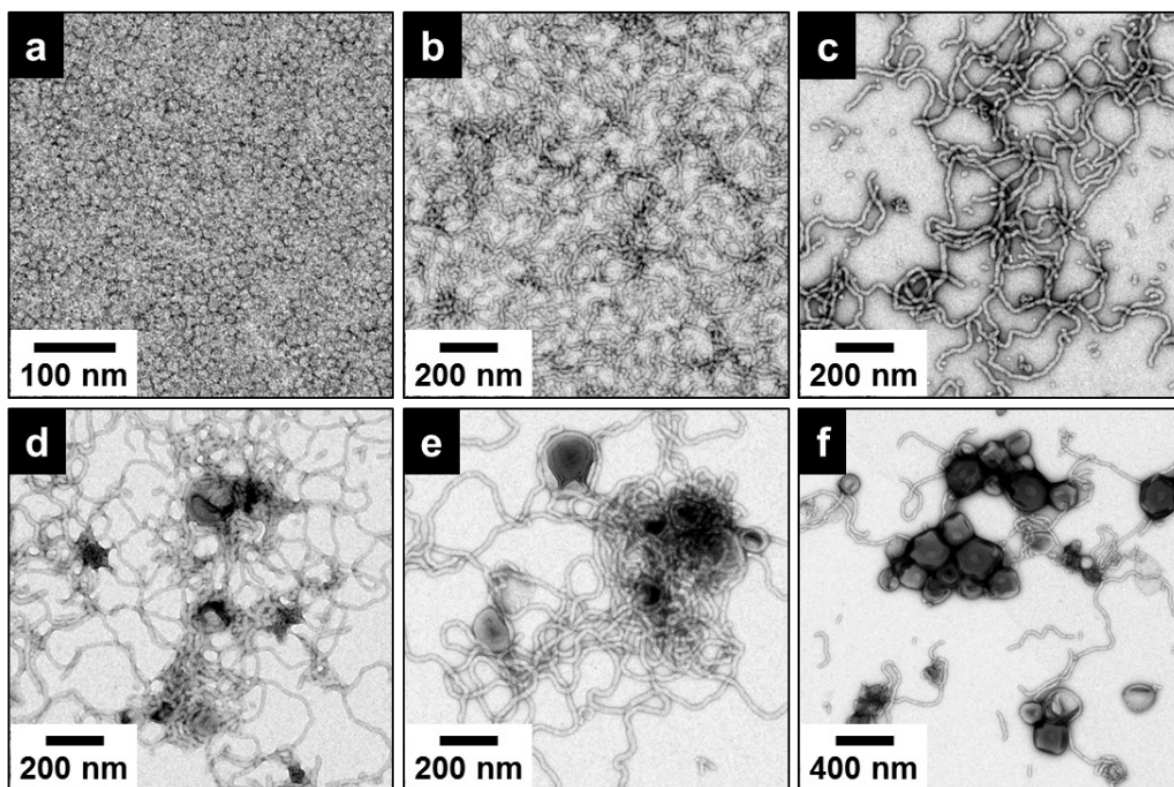

**Figure S5.** Representative TEM images obtained for PGMA<sub>25</sub>-PGlyMA<sub>x</sub> diblock copolymer nanoparticles prepared at 15% w/w by RAFT aqueous emulsion polymerization of GlyMA [ $x = 25$  (a), 40 (b), 45 (c), 50 (d), 55 (e) and 60 (f)].

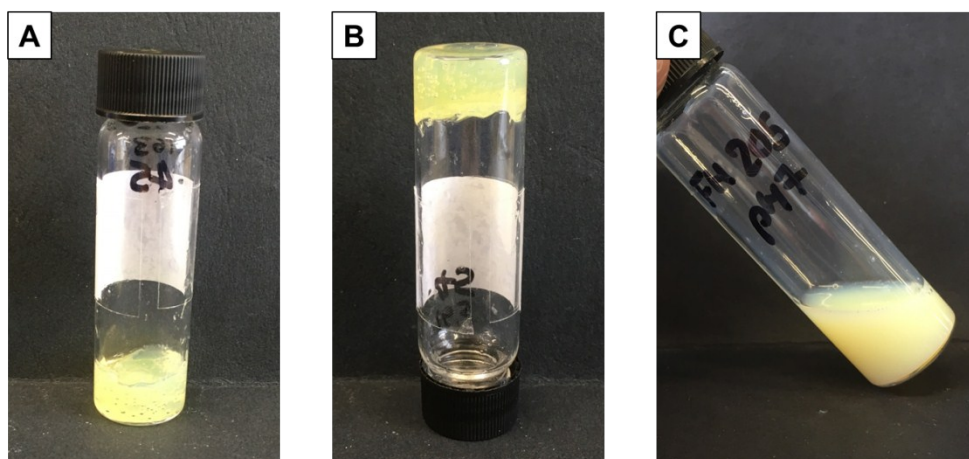

**Figure S6.** Digital photographs recorded for an as-synthesized PGMA<sub>25</sub>-PGlyMA<sub>45</sub> worm gel prepared at 15% w/w via RAFT aqueous emulsion polymerization of GlyMA using a PGMA<sub>25</sub> precursor at pH 3 (A). Tube inversion (B) confirms the free-standing nature of this physical aqueous gel. The same polymerization conducted at pH 7 (C) gave a turbid free-flowing liquid indicating that the formation of worms was inhibited, limiting the morphology to spheres, due to ionization of the carboxylic acid groups present at the chain ends from the CTA.

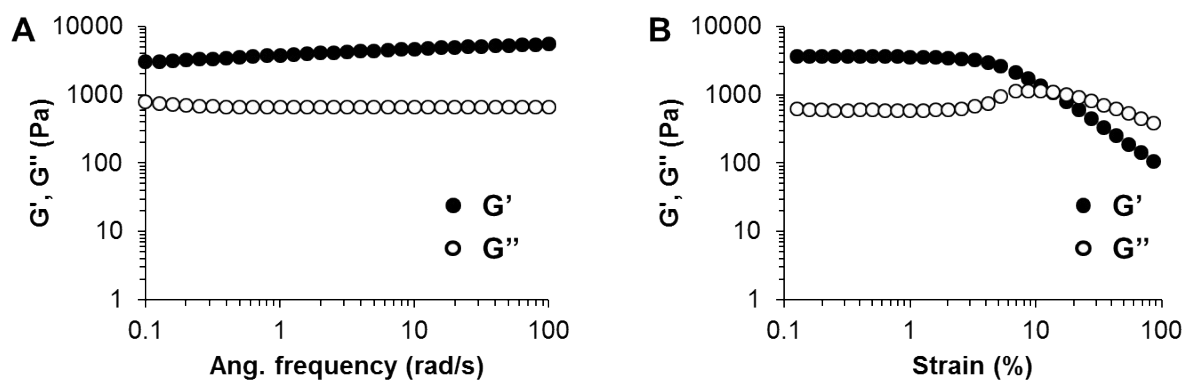

**Figure S7.** Rheological frequency sweep (A) and strain sweep (B) showing  $G'$  (closed symbols) and  $G''$  (open symbols) for the PGMA<sub>25</sub>-PGlyMA<sub>45</sub> diblock copolymer worm gel at 15% w/w.

**Table S3.** Nitrogen contents (%) and corresponding mean degrees of derivatization calculated for the 4-amino-TEMPO derivatized PGMA<sub>25</sub>-PGlyMA<sub>45</sub> diblock copolymer worms using elemental microanalysis. Epoxy-amine reactions were conducted using copolymer concentrations of 2.5-7.5% w/w at 50-70 °C for 3 to 24 h.

| Diblock copolymer concentration (% w/w) | Temperature (°C) | Time (h) | 4-aminoTEMPO /epoxy molar ratio | N% content | Degree of derivatization (%) <sup>a</sup> |
|-----------------------------------------|------------------|----------|---------------------------------|------------|-------------------------------------------|
| 2.5                                     | 50               | 6        | 1.50                            | 4.48       | 64.7                                      |
|                                         |                  | 24       | 1.50                            | 4.69       | 67.8                                      |
|                                         |                  | 6        | 1.50                            | 4.87       | 70.4                                      |
|                                         | 70               | 24       | 1.50                            | 4.93       | 71.2                                      |
|                                         |                  | 24       | 2.00                            | 5.12       | 74.0                                      |
|                                         |                  | 24       | 4.00                            | 5.53       | 79.9                                      |
| 5.0                                     | 50               | 6        | 1.00                            | 4.81       | 69.5                                      |
|                                         |                  | 6        | 1.25                            | 4.87       | 70.4                                      |
|                                         |                  | 6        | 1.50                            | 5.27       | 76.2                                      |
|                                         |                  | 6        | 2.00                            | 5.94       | 85.8                                      |
|                                         |                  | 6        | 4.00                            | 6.04       | 87.3                                      |
|                                         |                  | 24       | 1.50                            | 5.26       | 76.0                                      |
|                                         | 60               | 6        | 1.50                            | 5.62       | 81.2                                      |
|                                         |                  | 6        | 2.00                            | 5.32       | 76.9                                      |
|                                         |                  | 6        | 4.00                            | *          | *                                         |
|                                         |                  | 6        | 1.50                            | 5.17       | 74.7                                      |
|                                         |                  | 24       | 1.50                            | 5.06       | 73.1                                      |
|                                         |                  | 24       | 1.50                            | 5.06       | 73.1                                      |
| 6.0                                     | 50               | 6        | 1.50                            | *          | *                                         |
|                                         | 60               | 6        | 1.50                            | *          | *                                         |
|                                         | 70               | 6        | 1.50                            | *          | *                                         |
| 7.5                                     | 50               | 6        | 1.50                            | *          | *                                         |
|                                         | 70               | 6        | 1.50                            | *          | *                                         |

<sup>a</sup> Calculated using: Degree of derivatization = (experimental N% content / theoretical N% content) x 100, where the theoretical maximum N% content is 6.92% (assuming quantitative reaction).

\* Sample formed an insoluble, non-redispersible chemical gel

**Table S4.** DLS z-average diameters,  $D_z$ , polydispersity indices and derived count rates recorded for the precursor PGMA<sub>25</sub>-PGlyMA<sub>45</sub> diblock copolymer worms and 4-aminoTEMPO derivatized worms at copolymer concentrations of 0.1% w/w in either deionised water or DMF.

| Diblock copolymer                                   | DLS in H <sub>2</sub> O |      |                           | DLS in DMF |      |                           |
|-----------------------------------------------------|-------------------------|------|---------------------------|------------|------|---------------------------|
|                                                     | $D_z$ (nm)              | PDI  | Derived Count Rate (kcps) | $D_z$ (nm) | PDI  | Derived Count Rate (kcps) |
| PGMA <sub>25</sub> -PGlyMA <sub>45</sub>            | 144                     | 0.30 | 16982                     | 1601       | 0.93 | 125                       |
| PGMA <sub>25</sub> -P(GlyMA-NH-TEMPO) <sub>45</sub> | 194                     | 0.42 | 14595                     | 203        | 0.45 | 4234                      |

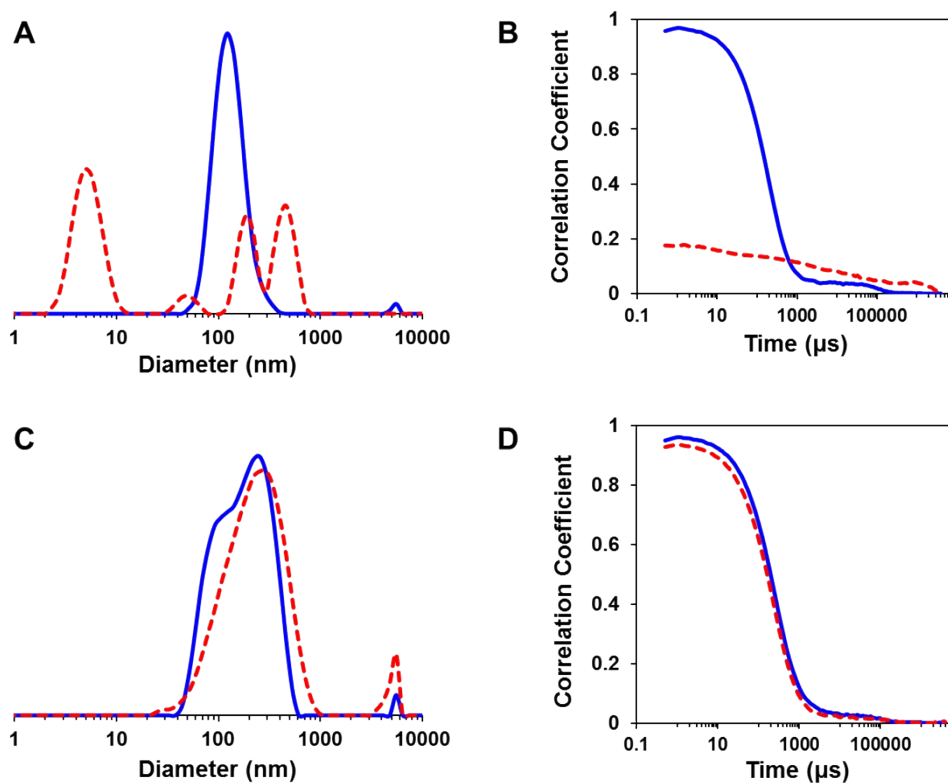

**Figure S8.** DLS size distributions by intensity (A) and corresponding correlagrams (B) for the precursor PGMA<sub>25</sub>-PGlyMA<sub>45</sub> diblock copolymer worms, and the DLS size distributions by intensity (C) and corresponding correlagrams (D) for the 4-aminoTEMPO derivatized worms. In each case the copolymer was diluted to 0.1% w/w in either water (blue solid lines) or DMF (red dashed lines). As the precursor PGMA<sub>25</sub>-PGlyMA<sub>45</sub> diblock copolymer chains are fully dissolved in DMF they do not scatter enough to obtain a satisfactory correlation function (B). Therefore, poor fitting of the correlation function is inaccurately represented as multiple populations in the size distribution by intensity plot.

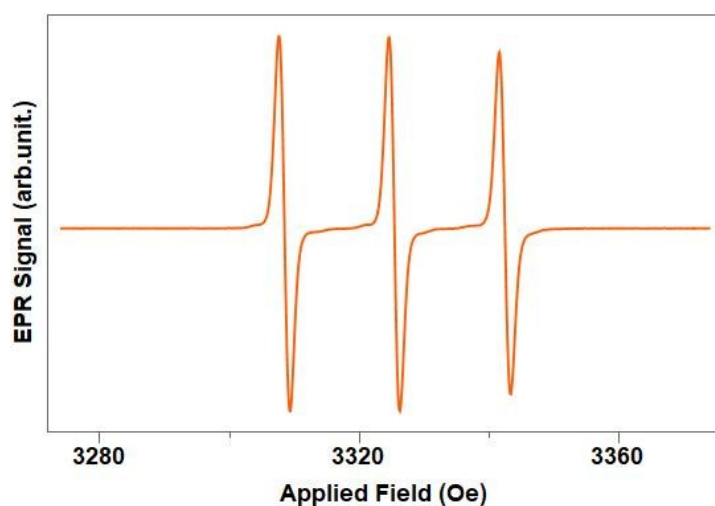

**Figure S9.** EPR spectrum recorded for a 1 mM aqueous solution of the 4-amino-TEMPO small molecule precursor, showing only sharp triplet signals for the unpaired electrons of this stable nitroxide species.



## SAXS Model

In general, the intensity of X-rays scattered by a dispersion of nano-objects [usually represented by the scattering cross-section per unit sample volume,  $\frac{d\Sigma}{d\Omega}(q)$ ] can be expressed as:

$$\frac{d\Sigma}{d\Omega}(q) = NS(q) \int_0^\infty \dots \int_0^\infty F(q, r_1, \dots, r_k)^2 \Psi(r_1, \dots, r_k) dr_1, \dots, dr_k$$

Equation S1

where  $F(q, r_1, \dots, r_k)$  is the form factor,  $r_1, \dots, r_k$  is a set of  $k$  parameters describing the structural morphology,  $\Psi(r_1, \dots, r_k)$  is the distribution function,  $S(q)$  is the structure factor and  $N$  is the number density per unit volume of nano-object expressed as:

$$N = \frac{\varphi}{\int_0^\infty \dots \int_0^\infty V(r_1, \dots, r_k) \Psi(r_1, \dots, r_k) dr_1, \dots, dr_k}$$

Equation S2

where  $V(r_1, \dots, r_k)$  is the volume of the nano-object and  $\varphi$  is the nano-object volume fraction.

### Worm-like micelle model

The worm-like micelle form factor for Equation S1 is given by:

$$F_{w\_mic}(q) = N_w^2 \beta_s^2 F_{sw}(q) + N_w \beta_c^2 F_c(q, R_g) + N_w(N_w - 1) \beta_c^2 S_{cc}(q) + 2N_w^2 \beta_s \beta_c S_{sc}(q)$$

Equation S3

where the core block and corona block X-ray scattering length contrast are given by  $\beta_s = V_s(\xi_s - \xi_{sol})$  and  $\beta_c = V_c(\xi_c - \xi_{sol})$  respectively. Here  $\xi_s$ ,  $\xi_c$  and  $\xi_{sol}$  are the X-ray scattering length densities of the core block ( $\xi_{PGlyMA} = 11.34 \times 10^{10} \text{ cm}^{-2}$ ), corona block ( $\xi_{PGMA} = 11.94 \times 10^{10} \text{ cm}^{-2}$ ) and solvent ( $\xi_{sol} = 9.42 \times 10^{10} \text{ cm}^{-2}$ ), respectively.  $V_s$  is the volume of the core block ( $V_{PGlyMA}$ ) and  $V_c$  is the volume of the corona block ( $V_{PGMA}$ ). These volumes were

calculated using  $\frac{M_{n, pol}}{N_A \rho}$ , where the solid-state density of PGlyMA homopolymer,  $\rho_{PGlyMA}$ , was determined by helium pycnometry to be  $1.25 \text{ g cm}^{-3}$  and the density of PGMA,  $\rho_{PGMA}$ , was taken to be  $1.31 \text{ g cm}^{-3}$ .  $M_{n, pol}$  corresponds to the number-average molecular weight of the an individual diblock copolymer chain as determined by  $^1\text{H}$  NMR spectroscopy.

The self-correlation term for the worm-like micelle core of radius  $R_{sw}$  is:

$$F_{sw}(q) = F_{worm}(q, L_w, b_w) A_{CSworm}^2(q, R_{sw})$$

which is a product of a core cross-section term:

$$F_{CSworm}(q, R_g) = A_{CSworm}^2(q, R_{sw}) = \left[ 2 \frac{J_1(qR_{sw})}{qR_{sw}} \right]^2$$

where  $J_1$  is the first-order Bessel function of the first kind, and a form factor  $F_{worm}(q, L_w, b_w)$  for self-avoiding semi-flexible chains represents the worm-like micelles, where  $b_w$  is the Kuhn length and  $L_w$  is the mean contour length. A complete expression for the chain form factor can be found elsewhere.<sup>4</sup> The self-correlation term for the corona block is given by the Debye function:

$$F_c(q, R_g) = \frac{2[\exp(-q^2 R_g^2) - 1 + q^2 R_g^2]}{q^4 R_g^4}$$

where  $R_g$  is the radius of gyration of the PGMA coronal block. The aggregation number of the worm-like micelle is:

$$N_w = (1 - x_{sol}) \frac{\pi R_{sw}^2 L_w}{V_s}$$

where  $x_{sol}$  is the volume fraction of solvent within the worm-like micelle core. Possible semi-spherical caps at the ends of each worm are not considered in this form factor.

## References

1. J. Ilavsky and P. R. Jemian, *Journal of Applied Crystallography*, 2009, **42**, 347-353.
2. L. P. D. Ratcliffe, A. J. Ryan and S. P. Armes, *Macromolecules*, 2013, **46**, 769-777.
3. C. J. Mable, N. J. Warren, K. L. Thompson, O. O. Mykhaylyk and S. P. Armes, *Chemical Science*, 2015, **6**, 6179-6188.
4. J. S. Pedersen and P. Schurtenberger, *Macromolecules*, 1996, **29**, 7602-7612.
